# Supplementary material for: Facile fabrication of a nickel hydroxide@carbon nanotube composite for enhanced supercapacitance performance
Source: Royal Society of Chemistry journal article supplement (doi:10.1039/d4nj01287a), 2024-01-01
Supplement: d4nj01287a1.pdf [file d4nj01287a1.pdf]

## Electronic Supplementary Information

# Facile fabrication of nickel hydroxide@carbon nanotubes composite for enhanced supercapacitance performance

Xuewei Ba<sup>a,b</sup>, Huaikang Zhang<sup>a</sup>, Xiang Zhou<sup>a</sup>, Cheng Cheng<sup>a</sup>, Xinyu Lan<sup>a</sup>, Xinyu Han<sup>a</sup>, Wenping Huang<sup>a</sup>, Deqing Zhang<sup>a,b</sup>, Yan Yu<sup>a,b</sup>, Shuhua Li<sup>a,b</sup>

a.School of Materials Science and Engineering, Qiqihar University, Qiqihar, 161006, China.

b.Heilongjiang Provincial Key Laboratory of Polymeric Composition materials, Qiqihar, 161006, China.

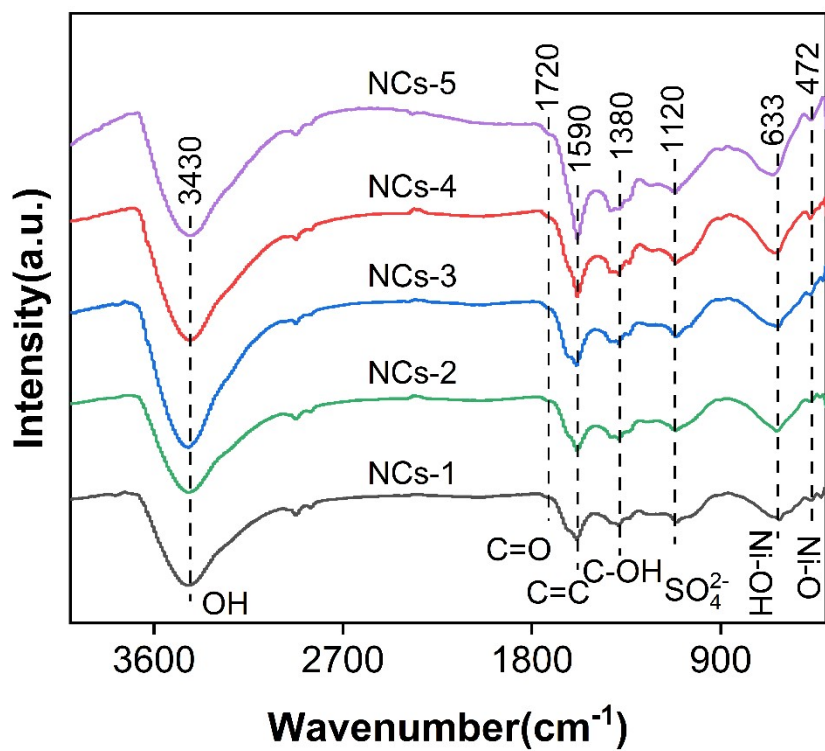

**Fig. S1** Infrared spectra of NCs composites synthesized at different reaction time.

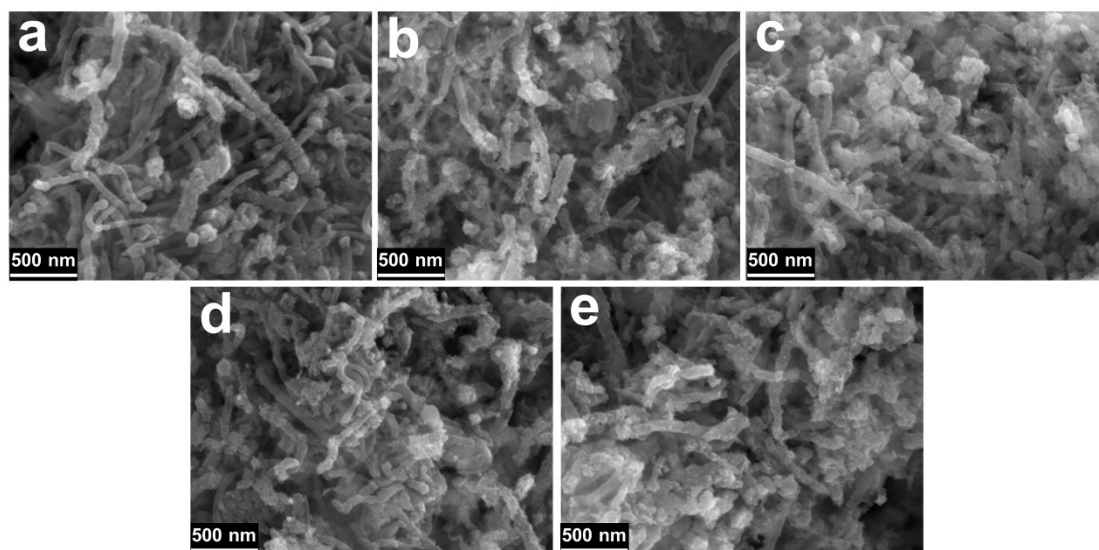

**Fig. S2** SEM images of NCs composites synthesized during different reaction times:

(a)1 h; (b)2 h; (c)3 h; (d)4 h and (e)5h.

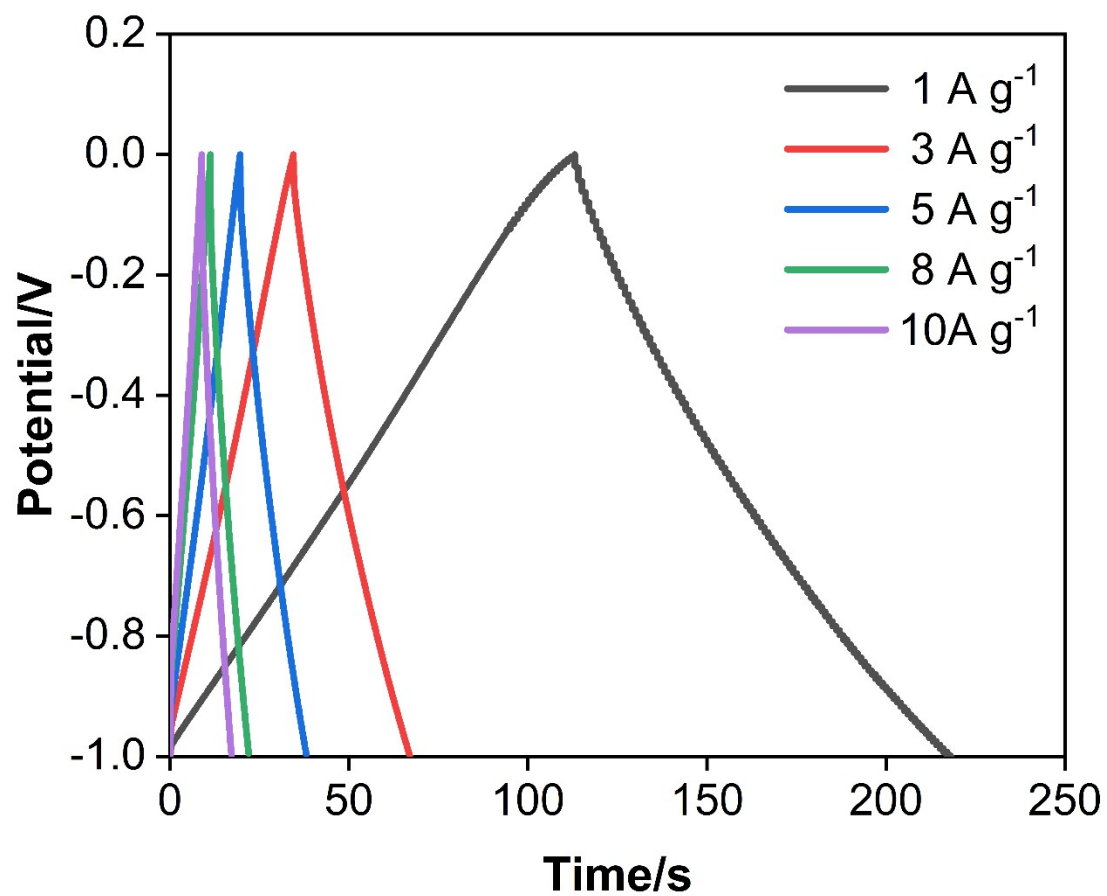

Fig. S3 GCD curves of active carbon.

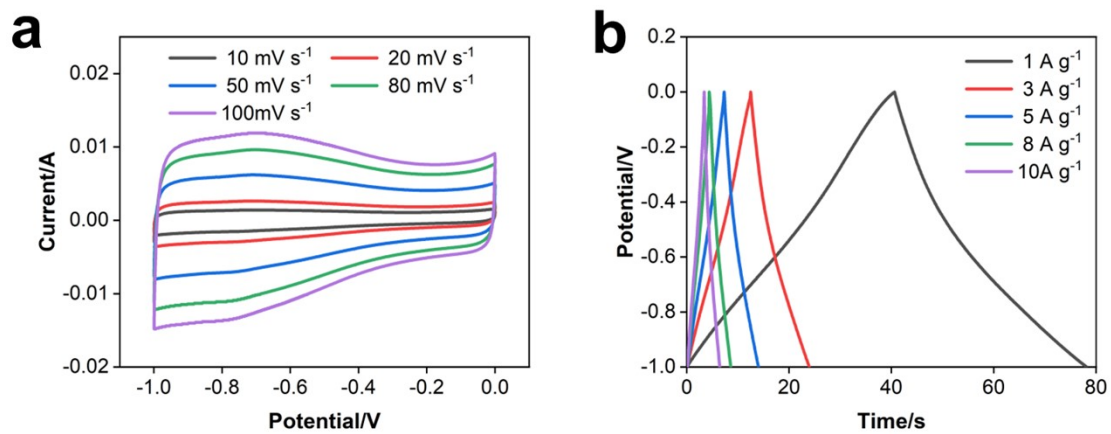

**Fig. S4** (a) CV curves of CNTs; (b) GCD curves of CNTs.

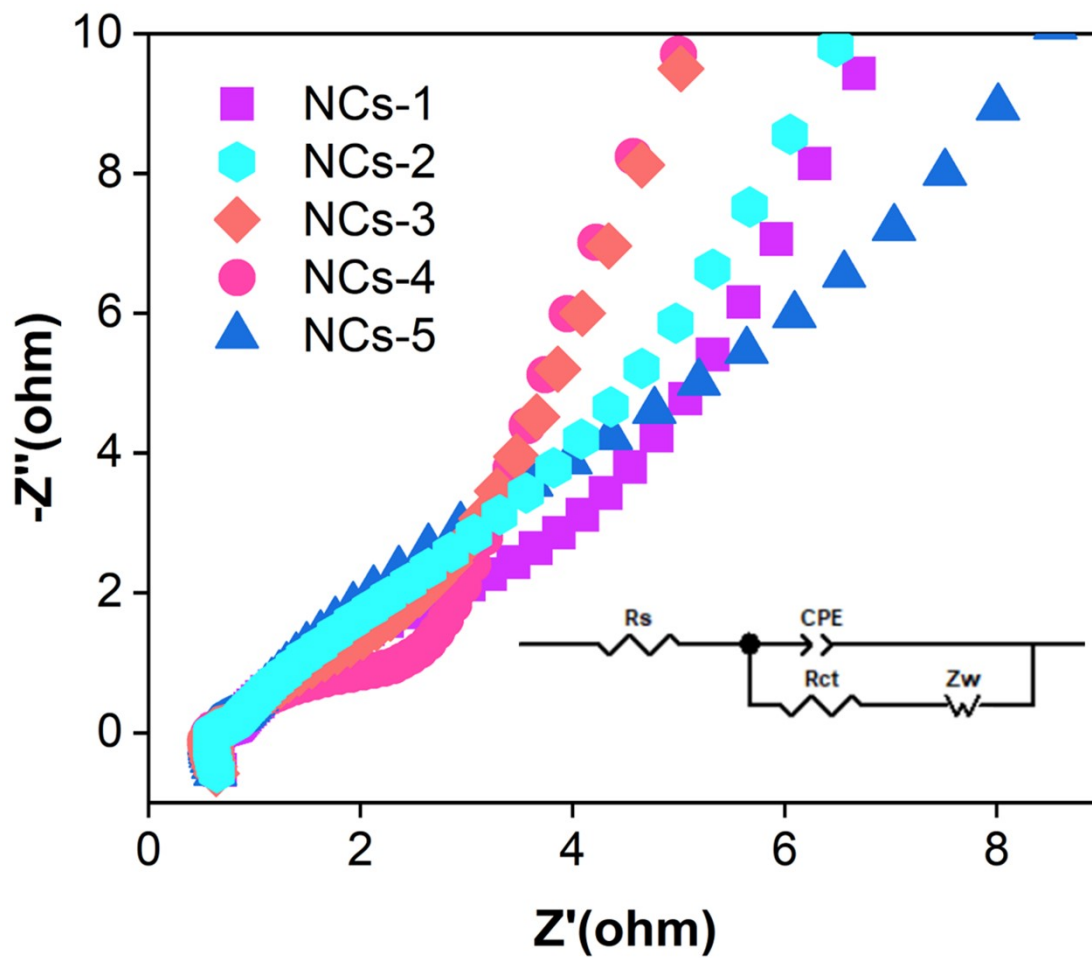

Fig. S5 EIS plots of NCs composites synthesized at different reaction times.
