# Supplementary figures and images for: Facile fabrication of a nickel hydroxide@carbon nanotube composite for enhanced supercapacitance performance
Source: Royal Society of Chemistry journal article supplement (doi:10.1039/d4nj01287a), 2024-01-01

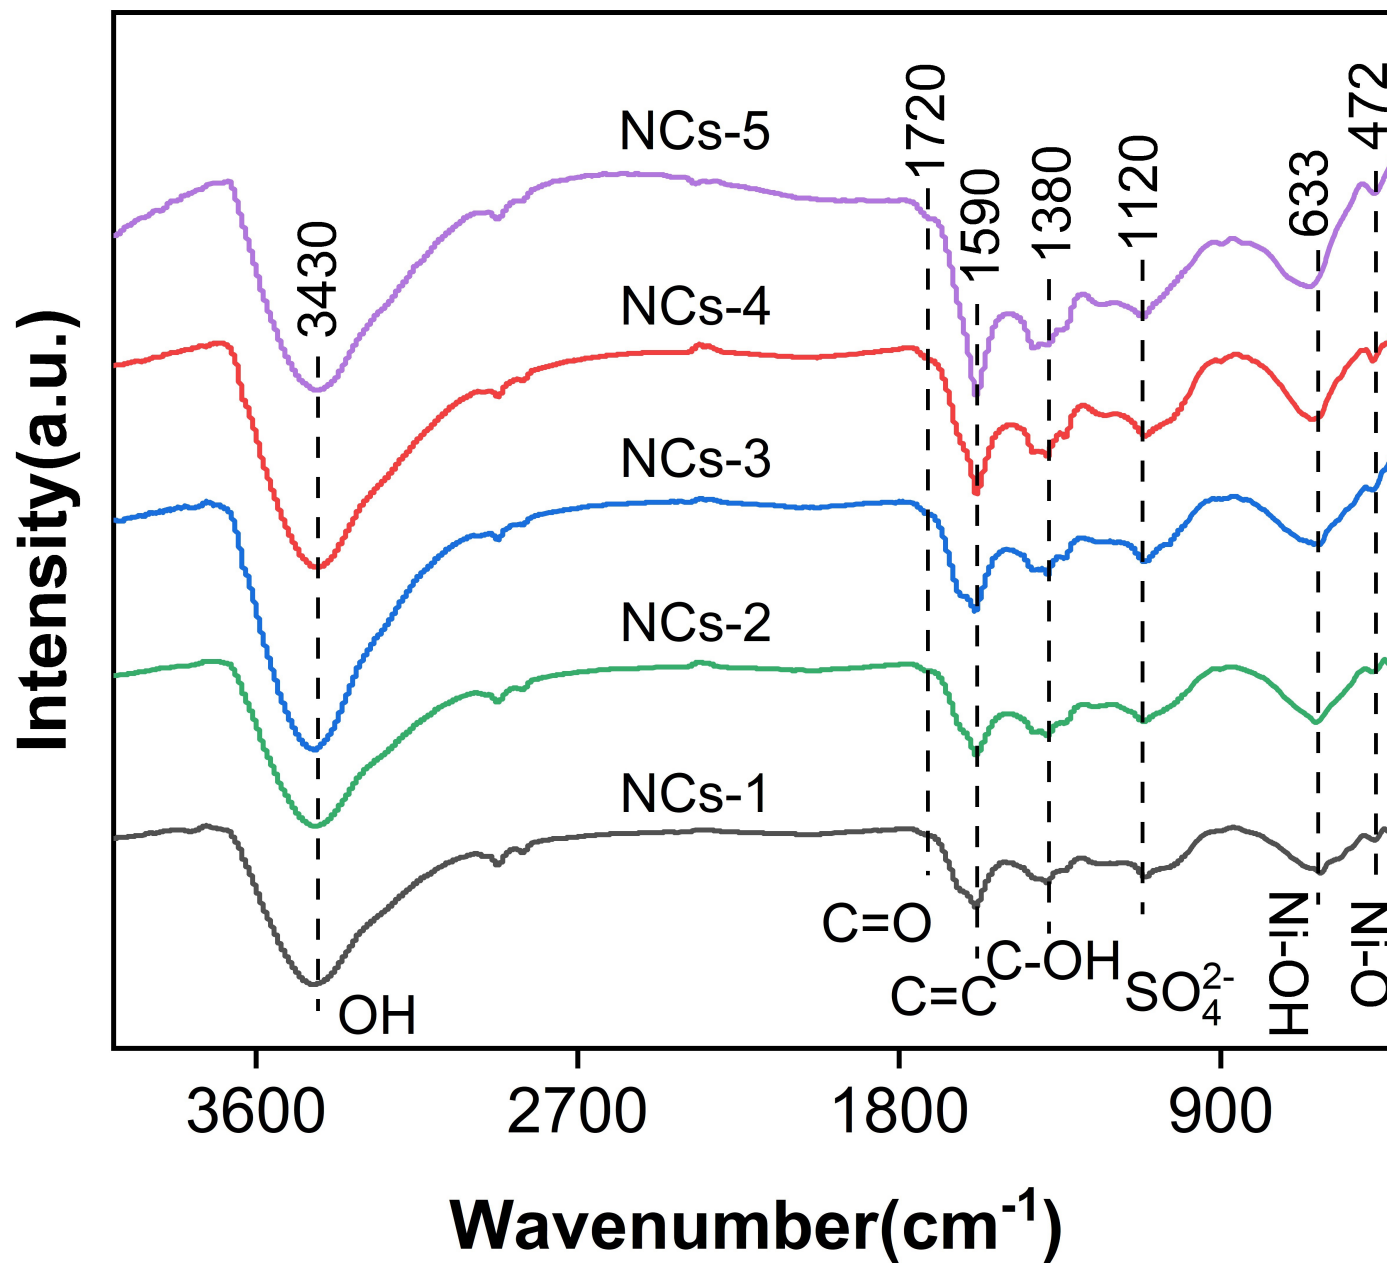

Supplement: d4nj01287a3.pdf [file d4nj01287a3.pdf]

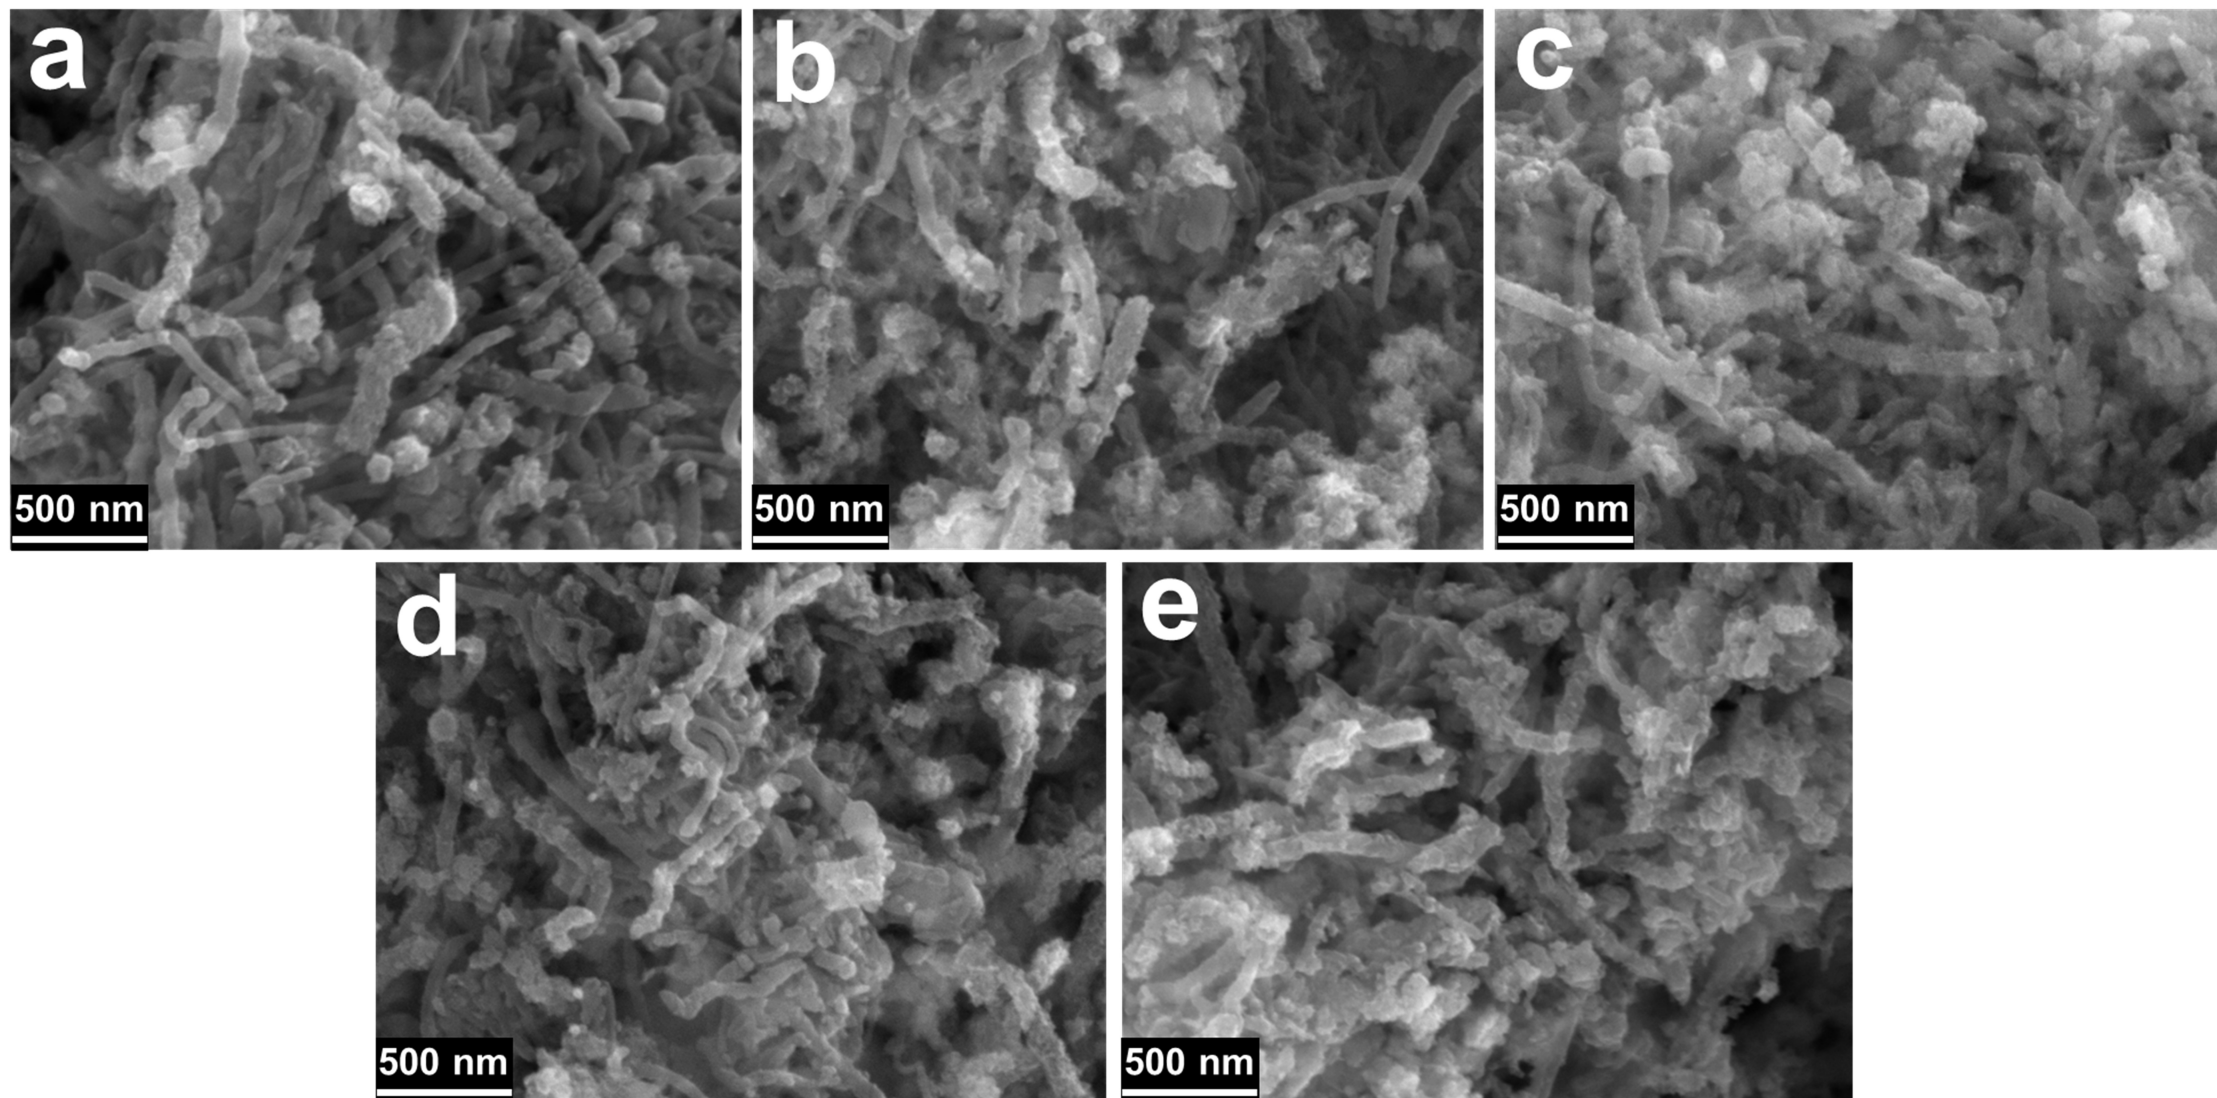

Supplement: d4nj01287a4.pdf [file d4nj01287a4.pdf]

**a**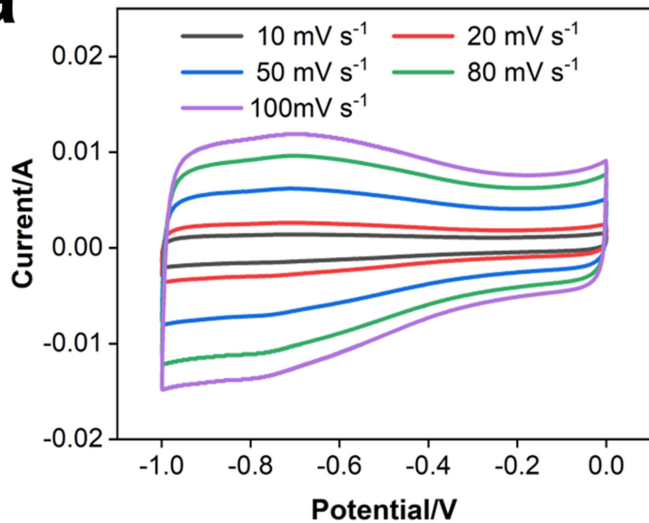**b**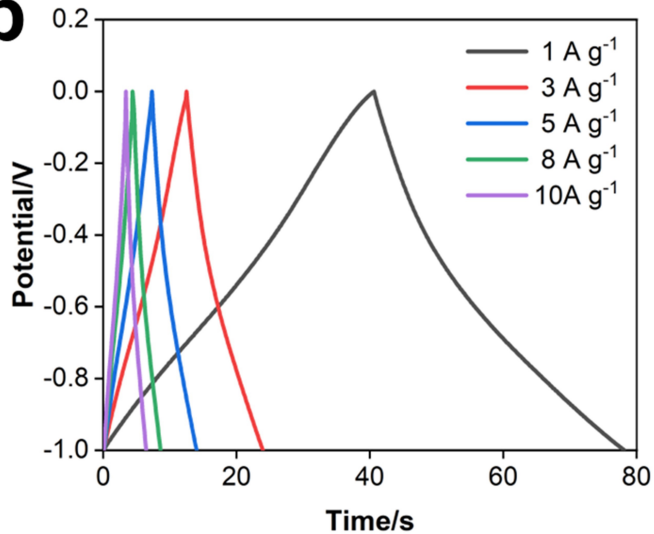

Supplement: d4nj01287a5.pdf [file d4nj01287a5.pdf]

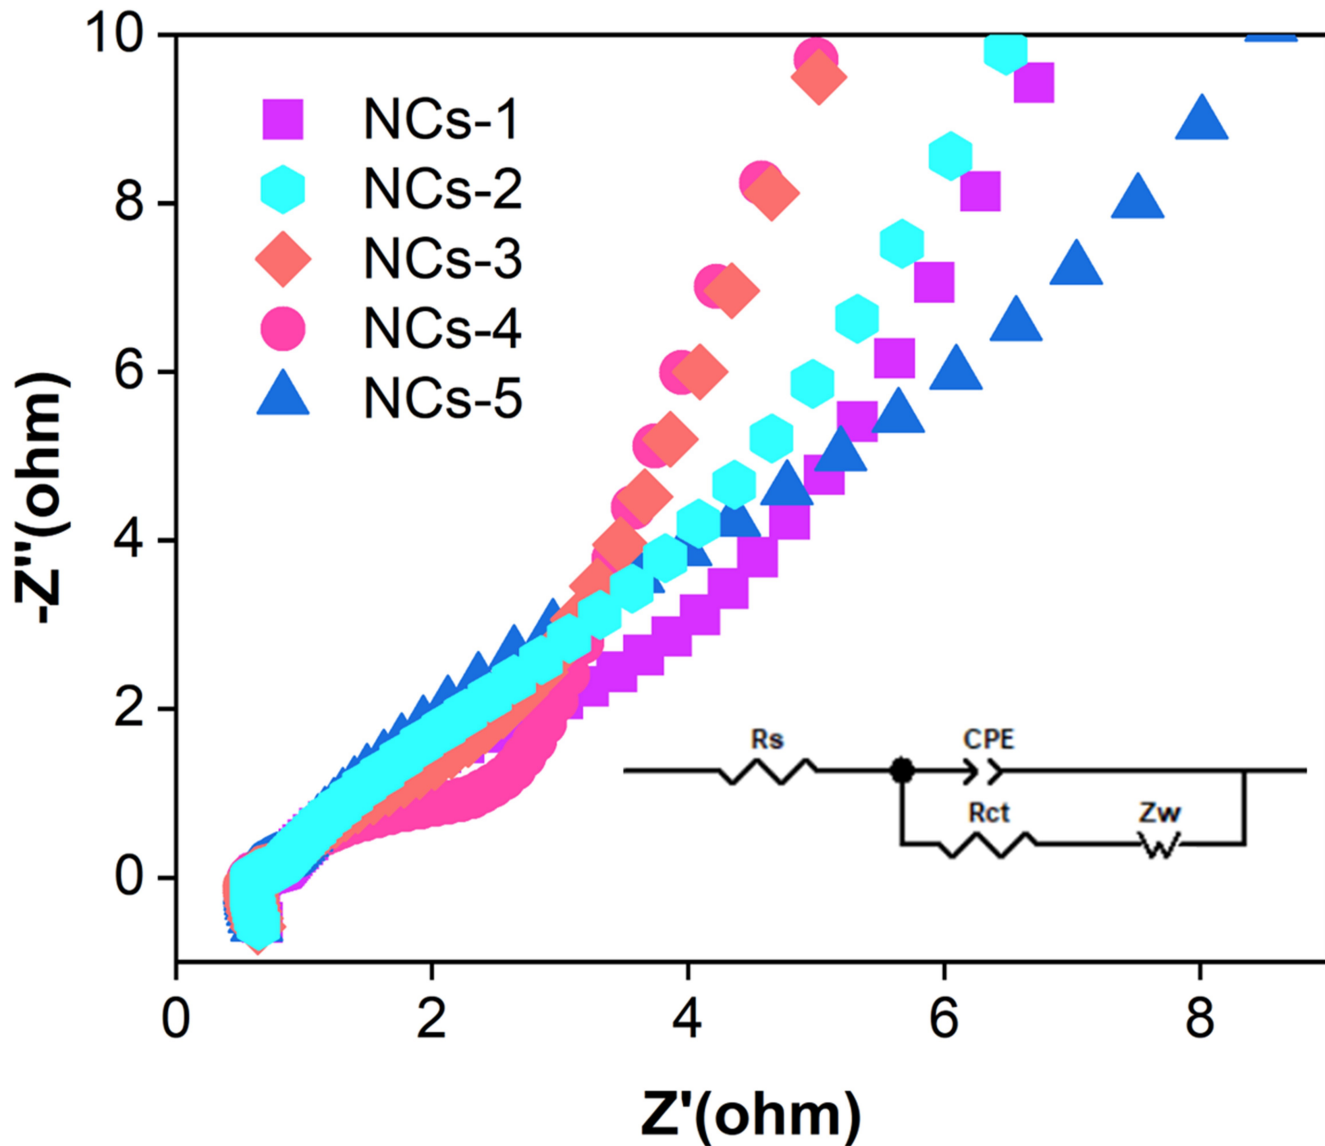

Supplement: d4nj01287a6.pdf [file d4nj01287a6.pdf]
